# Supplementary material for: CD73 Downregulation by EGFR-Targeted Liposomal CD73 siRNA Potentiates Antitumor Effect of Liposomal Doxorubicin (Doxil) in 4T1 Tumor-Bearing Mice
Source: Research Square preprint supplement (doi:10.21203/rs.3.rs-1008064/v1), 2021-11-10
Supplement: Supplementary file 1 [file 8e597c9c4c4a291ce95ee629.docx]

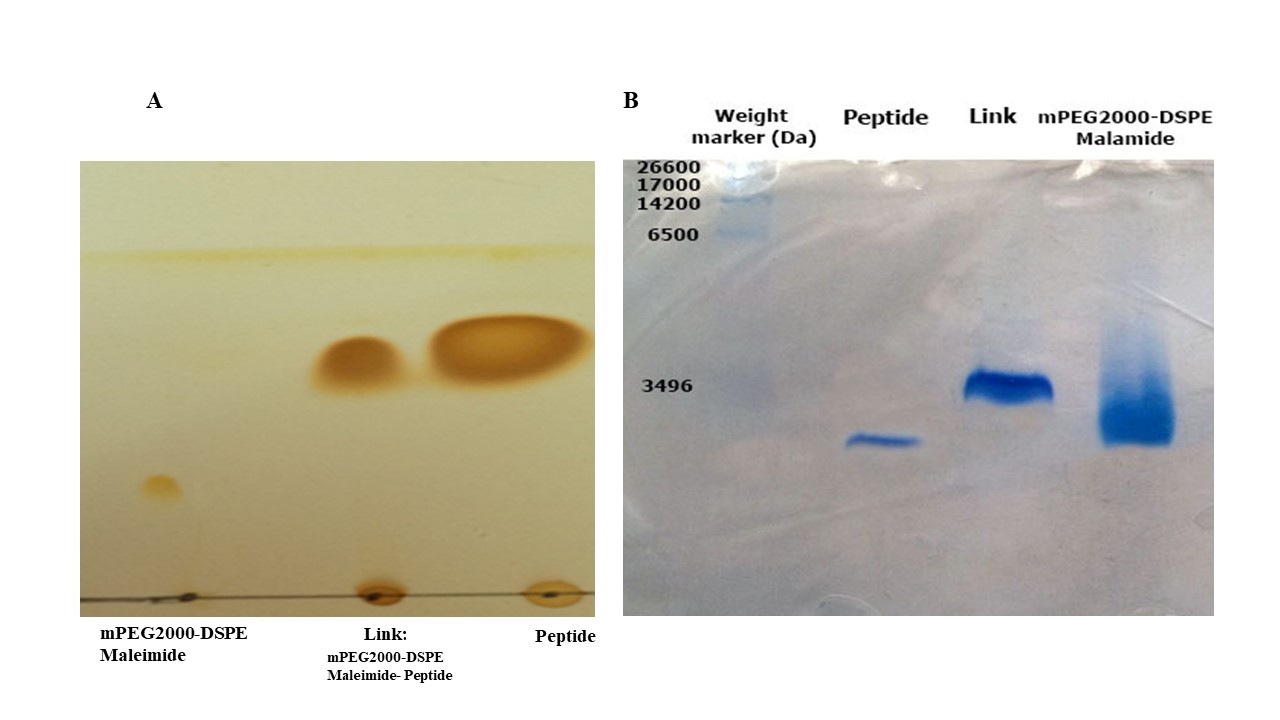


Figure1: Conjugation of GE11 peptide with mPEG2000- DSPE Maleimide. Figure 1A represents the TLC test for confirmation of linkage between GE11 and mPEG2000- DSPE Maleimide. Figure 1B also shows the confirmation of linkage by SDS PAGE test.


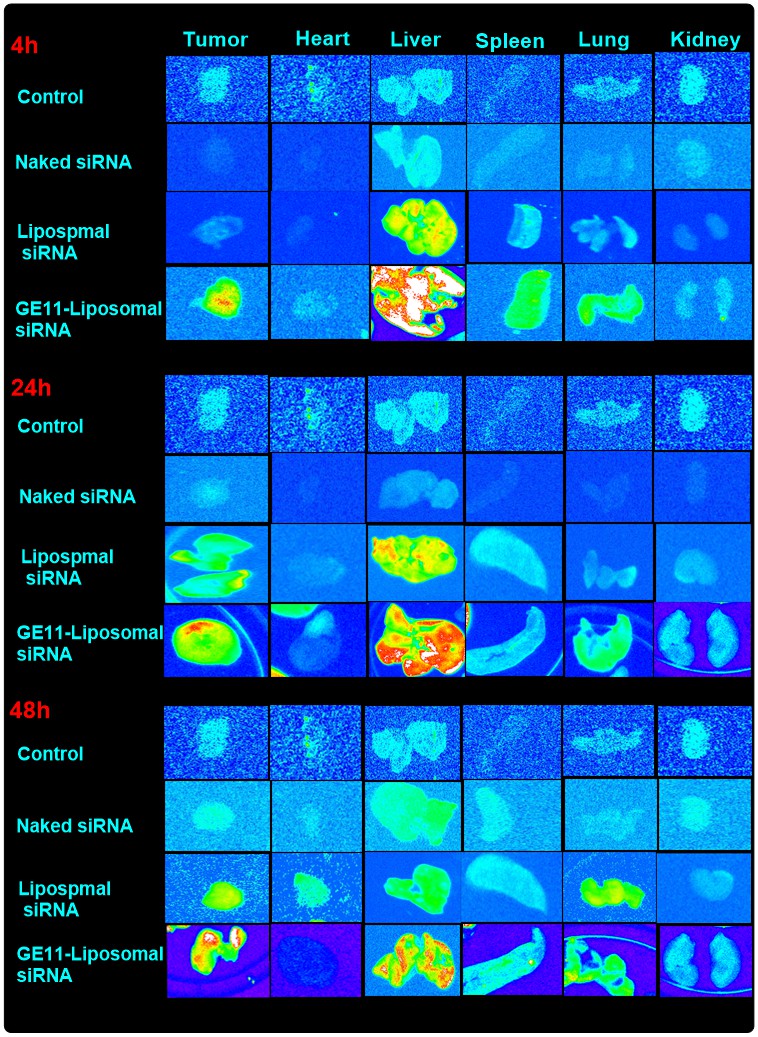


**Figure 2:** Tissue biodistribution of EGFR-targeted and non-targeted liposomal formulation containing Cy3-siRNA at three-time intervals (4, 24 and 48 h post injection) in tumor site, heart, liver, spleen, lung, and kidney tissues. The intensity of Cy3 fluorescence dye indicates qualitative drug accumulation in different tissues.





Figure 3: Gating strategy of Tumor infiltrated lymphocytes by flowcytometry
